# Supplementary material for: Steric and electronic control over the structural diversity of N-(n-pyridinyl) diphenylphosphinic amides (n = 2 and 4) as difunctional ligands in triphenyltin(iv) adducts
Source: Royal Society of Chemistry journal article supplement (doi:10.1039/c4ra06212d), 2014-09-19

## Supporting information

**Table S1** Crystallographic data for compounds **C<sub>1</sub>** and **C<sub>2</sub>**.

| Compound reference                                                            | <b>C<sub>1</sub></b>                                  | <b>C<sub>2</sub></b>                                                                                    |
|-------------------------------------------------------------------------------|-------------------------------------------------------|---------------------------------------------------------------------------------------------------------|
| Chemical formula                                                              | C <sub>35</sub> H <sub>30</sub> CIN <sub>2</sub> OPSn | C <sub>35</sub> H <sub>30</sub> CIN <sub>2</sub> OPSn•C <sub>17</sub> H <sub>15</sub> N <sub>2</sub> OP |
| Formula Mass                                                                  | 679.78                                                | 974.00                                                                                                  |
| Crystal system                                                                | Monoclinic                                            | Triclinic                                                                                               |
| <i>a</i> /Å                                                                   | 57.264(2)                                             | 9.9181(6)                                                                                               |
| <i>b</i> /Å                                                                   | 9.8858(2)                                             | 14.7686(9)                                                                                              |
| <i>c</i> /Å                                                                   | 22.2965(8)                                            | 16.9564(10)                                                                                             |
| <i>α</i> /°                                                                   | 90.00                                                 | 82.955(5)                                                                                               |
| <i>β</i> /°                                                                   | 93.908(3)                                             | 81.181(5)                                                                                               |
| <i>γ</i> /°                                                                   | 90.00                                                 | 74.541(5)                                                                                               |
| Unit cell volume/Å <sup>3</sup>                                               | 12592.6(7)                                            | 2356.8(2)                                                                                               |
| Temperature/K                                                                 | 292(2)                                                | 292(2)                                                                                                  |
| Space group                                                                   | <i>C</i> 2/ <i>n</i>                                  | <i>P</i> $\bar{1}$                                                                                      |
| No. of formula units per unit cell, <i>Z</i>                                  | 16                                                    | 2                                                                                                       |
| No. of reflections measured                                                   | 39843                                                 | 46955                                                                                                   |
| No. of independent reflections                                                | 11829                                                 | 12706                                                                                                   |
| <i>R</i> <sub>int</sub>                                                       | 0.0235                                                | 0.0480                                                                                                  |
| Final <i>R</i> <sub><i>I</i></sub> values ( <i>I</i> > 2σ( <i>I</i> ))        | 0.0252                                                | 0.0491                                                                                                  |
| Final <i>wR</i> ( <i>F</i> <sup>2</sup> ) values ( <i>I</i> > 2σ( <i>I</i> )) | 0.0561                                                | 0.1275                                                                                                  |
| Final <i>R</i> <sub><i>I</i></sub> values (all data)                          | 0.0377                                                | 0.0699                                                                                                  |
| Final <i>wR</i> ( <i>F</i> <sup>2</sup> ) values (all data)                   | 0.0602                                                | 0.1557                                                                                                  |
| Goodness of fit on <i>F</i> <sup>2</sup>                                      | 1.021                                                 | 1.048                                                                                                   |
| Flack parameter                                                               |                                                       |                                                                                                         |
| Rogers parameter                                                              |                                                       |                                                                                                         |
| CCDC number                                                                   | 978396                                                | 978395                                                                                                  |

**Table S2** Selected bond lengths (Å) and angles (°) for compound **C<sub>1</sub>**.

| <i>Bond length (Å)</i> |            |                    |            |
|------------------------|------------|--------------------|------------|
| Sn(1)-Cl(1)            | 2.4693(8)  | P(1)-C(1)          | 1.789(2)   |
| Sn(1)-O(1)             | 2.4637(15) | P(1)-C(7)          | 1.788(2)   |
| Sn(1)-C(16A)           | 2.133(4)   | P(2)-O(2)          | 1.4848(15) |
| Sn(1)-C(22)            | 2.137(2)   | P(2)-N(4)          | 1.6493(18) |
| Sn(1)-C(28)            | 2.132(3)   | P(2)-C(63)         | 1.800(2)   |
| Sn(2)-Cl(2)            | 2.4820(6)  | P(2)-C(81)         | 1.790(2)   |
| Sn(2)-O(2)             | 2.4031(14) | N(1)-C(45)         | 1.328(3)   |
| Sn(2)-C(51)            | 2.132(2)   | N(1)-C(49)         | 1.341(3)   |
| Sn(2)-C(57)            | 2.127(2)   | N(2)-C(45)         | 1.395(3)   |
| Sn(2)-C(72A)           | 2.140(3)   | N(3)-C(91)         | 1.332(3)   |
| P(1)-O(1)              | 1.4894(15) | N(3)-C(95)         | 1.342(3)   |
| P(1)-N(2)              | 1.6663(18) | N(4)-C(91)         | 1.402(3)   |
| <i>Bond angles (°)</i> |            |                    |            |
| Cl(1)-Sn(1)-O(1)       | 178.21(5)  | O(2)-Sn(2)-C(72A)  | 88.0(3)    |
| Cl(1)-Sn(1)-C(16A)     | 93.4(6)    | C(51)-Sn(2)-C(57)  | 118.76(9)  |
| Cl(1)-Sn(1)-C(22)      | 94.80(7)   | C(51)-Sn(2)-C(72A) | 117.8(3)   |
| Cl(1)-Sn(1)-C(28)      | 93.04(7)   | C(57)-Sn(2)-C(72A) | 121.6(3)   |
| O(1)-Sn(1)-C(16A)      | 87.0(6)    | Sn(2)-O(2)-P(2)    | 154.60(9)  |
| O(1)-Sn(1)-C(22)       | 86.44(7)   | Sn(2)-C(51)-C(52)  | 121.06(17) |
| O(1)-Sn(1)-C(28)       | 85.22(7)   | Sn(2)-C(51)-C(56)  | 120.95(17) |
| C(16A)-Sn(1)-C(22)     | 125.3(6)   | Sn(2)-C(57)-C(58)  | 121.9(2)   |
| C(16A)-Sn(1)-C(28)     | 114.3(6)   | Sn(2)-C(57)-C(62)  | 119.7(2)   |
| C(22)-Sn(1)-C(28)      | 119.06(9)  | P(1)-C(1)-C(2)     | 120.9(2)   |
| Sn(1)-O(1)-P(1)        | 145.44(9)  | P(1)-C(1)-C(6)     | 120.06(19) |
| Sn(1)-C(16A)-C(17A)    | 120.0(8)   | N(1)-C(45)-N(2)    | 115.14(19) |
| Sn(1)-C(16A)-C(21A)    | 118.0(9)   | O(2)-P(2)-N(4)     | 113.85(9)  |
| Sn(1)-C(22)-C(23)      | 121.98(18) | O(2)-P(2)-C(63)    | 109.88(9)  |
| Sn(1)-C(22)-C(27)      | 119.89(18) | O(2)-P(2)-C(81)    | 114.30(10) |
| Cl(2)-Sn(2)-O(2)       | 176.99(4)  | N(4)-P(2)-C(63)    | 108.65(10) |
| Cl(2)-Sn(2)-C(51)      | 94.20(6)   | N(4)-P(2)-C(81)    | 101.66(10) |
| Cl(2)-Sn(2)-C(57)      | 94.99(6)   | C(63)-P(2)-C(81)   | 108.05(11) |
| Cl(2)-Sn(2)-C(72A)     | 94.2(3)    | P(2)-N(4)-C(91)    | 127.85(15) |
| O(2)-Sn(2)-C(51)       | 86.56(7)   | P(2)-C(63)-C(64)   | 120.22(17) |
| O(2)-Sn(2)-C(57)       | 82.10(7)   | P(2)-C(81)-C(82)   | 118.67(18) |
| Sn(2)-C(72A)-C(73A)    | 122.4(8)   | N(1)-C(45)-C(46)   | 122.3(2)   |
| Sn(2)-C(72A)-C(77A)    | 119.7(8)   | N(2)-C(45)-C(46)   | 122.5(2)   |
| O(1)-P(1)-N(2)         | 114.26(9)  | N(1)-C(49)-C(48)   | 124.5(2)   |
| O(1)-P(1)-C(1)         | 114.01(10) | N(1)-C(49)-H(49)   | 117.7      |
| O(1)-P(1)-C(7)         | 110.91(10) | N(3)-C(91)-N(4)    | 114.1(9)   |
| N(2)-P(1)-C(1)         | 103.27(10) | N(3)-C(91)-C(92)   | 123.5(2)   |
| N(2)-P(1)-C(7)         | 105.90(11) | N(4)-C(91)-C(92)   | 122.4(2)   |
| C(1)-P(1)-C(7)         | 107.83(10) | N(3)-C(95)-C(94)   | 124.5(2)   |
| P(1)-N(2)-C(45)        | 124.93(15) | N(3)-C(95)-H(95)   | 117.8      |

**Table S3** Selected bond lengths (Å) and angles (°) for compound **C<sub>2</sub>**.

---

| <i>Bond length (Å)</i>     |            |                  |            |
|----------------------------|------------|------------------|------------|
| Sn(1)-Cl(1)                | 2.5029(9)  | P(2)-N(4)        | 1.658(3)   |
| Sn(1)-N(1)                 | 2.553(3)   | P(2)-C(51)       | 1.799(3)   |
| Sn(1)-C(16)                | 2.125(3)   | P(2)-C(71)       | 1.799(3)   |
| Sn(1)-C(22)                | 2.135(3)   | N(1)-C(45)       | 1.332(4)   |
| Sn(1)-C(28)                | 2.125(3)   | N(1)-C(49)       | 1.329(5)   |
| P(1)-O(1)                  | 1.480(2)   | N(2)-C(47)       | 1.393(4)   |
| P(1)-N(2)                  | 1.668(3)   | N(3)-C(61)       | 1.327(7)   |
| P(1)-C(1)                  | 1.798(4)   | N(3)-C(65)       | 1.322(7)   |
| P(1)-C(7)                  | 1.792(3)   | N(4)-C(63)       | 1.391(4)   |
| P(2)-O(2)                  | 1.484(2)   |                  |            |
| <br><i>Bond angles (°)</i> |            |                  |            |
| Cl(1)-Sn(1)-N(1)           | 175.82(7)  | P(1)-N(2)-C(47)  | 125.2(2)   |
| Cl(1)-Sn(1)-C(16)          | 92.54(9)   | P(1)-C(1)-C(2)   | 124.7(3)   |
| Cl(1)-Sn(1)-C(22)          | 93.34(9)   | P(1)-C(7)-C(8)   | 122.3(3)   |
| Cl(1)-Sn(1)-C(28)          | 94.72(9)   | P(2)-N(4)-H(44)  | 114(3)     |
| N(1)-Sn(1)-C(16)           | 85.01(11)  | P(2)-N(4)-C(63)  | 125.7(3)   |
| N(1)-Sn(1)-C(22)           | 90.80(11)  | P(2)-C(51)-C(56) | 121.7(3)   |
| N(1)-Sn(1)-C(28)           | 83.78(11)  | N(2)-P(1)-C(1)   | 107.66(17) |
| C(16)-Sn(1)-C(22)          | 117.71(13) | N(2)-P(1)-C(7)   | 101.33(15) |
| C(16)-Sn(1)-C(28)          | 122.28(15) | N(1)-C(45)-H(45) | 117.9      |
| C(22)-Sn(1)-C(28)          | 118.87(14) | N(1)-C(45)-C(46) | 124.2(3)   |
| Sn(1)-N(1)-C(45)           | 120.3(2)   | N(2)-C(47)-C(46) | 120.7(3)   |
| Sn(1)-N(1)-C(49)           | 123.9(2)   | N(2)-C(47)-C(48) | 122.6(3)   |
| Sn(1)-C(28)-C(29)          | 122.8(3)   | N(3)-C(61)-H(61) | 117.6      |
| O(1)-P(1)-N(2)             | 114.26(15) | N(3)-C(61)-C(62) | 124.8(5)   |
| O(1)-P(1)-C(1)             | 110.95(16) | N(3)-C(65)-C(64) | 125.2(5)   |
| O(1)-P(1)-C(7)             | 113.07(16) | N(4)-P(2)-C(51)  | 101.93(15) |
| O(2)-P(2)-N(4)             | 114.41(16) | N(4)-P(2)-C(71)  | 106.99(16) |
| O(2)-P(2)-C(51)            | 113.05(16) | N(4)-C(63)-C(62) | 119.4(3)   |
| O(2)-P(2)-C(71)            | 111.09(15) | N(4)-C(63)-C(64) | 122.9(4)   |
| P(1)-N(2)-H(22)            | 117(3)     |                  |            |

---

**Figure S1.** Representation of the fully optimized ligands and Binuclear complex and the H-bonded systems of  $C_1$  and  $C_2$  (including  $L_2'$ ).

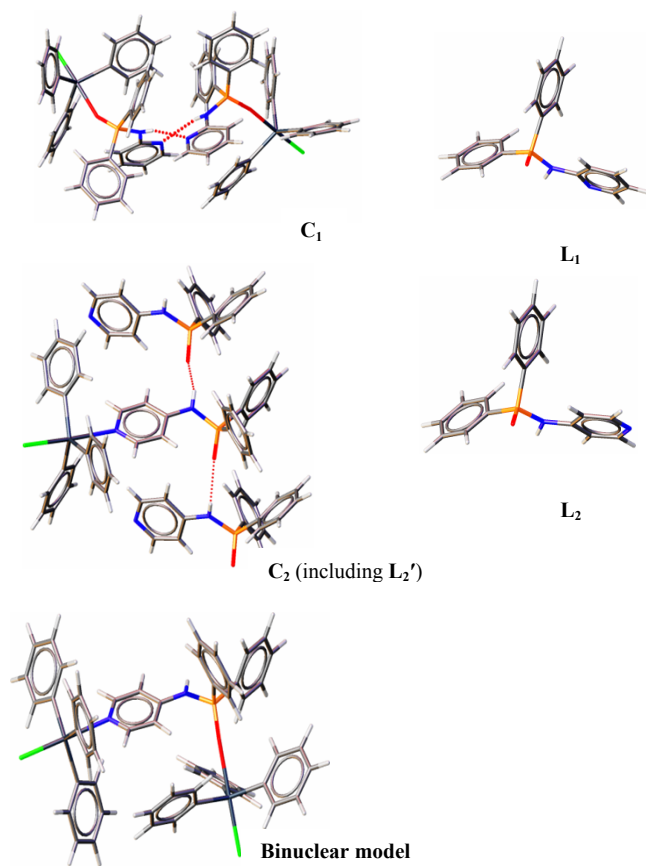

Supplement: c4ra06212d1.pdf [file c4ra06212d1.pdf]
